# Supplementary material
Source: PubMed Central journal article supplement (PMC7218498)
Supplement: jama-323-1792-s001.pdf [file jama-323-1792-s001.pdf]

1 **Supplement 1**

2

3 **Protocol and statistical analysis plan**

4

5 **Effect of surgery vs functional bracing on functional outcome among patients with closed displaced**  
6 **humeral shaft fractures: The FISH Randomized Clinical Trial**

7

8 Lasse Rämö, Bakir O. Sumrein, Vesa Lepola, Tuomas Lähdeoja, Jonas Ranstam, Mika Paavola, Teppo  
9 Järvinen and Simo Taimela on behalf of Finnish Shaft of the Humerus (FISH) Investigators

10

11

12 **This supplement contains the following items:**

13 1. PROTOCOL 2

14 1.1. Original Protocol 2

15 1.2. Final Protocol 4

16 1.3. Summary of Amendments 4

17 2. STATISTICAL ANALYSIS PLAN 6

18 2.1. Original Statistical Plan 6

19 2.2. Blinded Data Interpretation Protocol 6

20 2.3. Final Statistical Analysis Plan 7

21 2.4. Implementation of Analysis Plan 7

22

23

24 **1. PROTOCOL**

25  
26 **1.1. Original Protocol**

27 Original protocol submitted to Clinical Trials.gov on October 30, 2012 can be accessed at:  
28 [https://clinicaltrials.gov/ct2/history/NCT01719887?V\\_1=View#StudyPageTop](https://clinicaltrials.gov/ct2/history/NCT01719887?V_1=View#StudyPageTop)

29  
30 This same protocol with relevant information is copied below:

31 Study Start: October 2012 (first patient recruited November 4, 2012)

32 First Submitted: October 28, 2012 (at clinicaltrials.gov)

33  
34 **Brief Summary**

35 Humeral shaft fractures represent 1-3% of all fractures and 20% of the humeral fractures. These fractures have  
36 historically been treated mainly conservatively with good results. Recent development in fracture treatment and  
37 findings that certain fracture types are more prone to non-union and bracing-related functional problems of adjacent  
38 joints are somewhat common have caused increasing interest in treating these fractures surgically. Return to activities  
39 is also considered to be quicker among surgically treated patients.

40  
41 The purpose of this study is to evaluate effectiveness and cost-effectiveness of surgical treatment of humeral shaft  
42 fractures. Patients with a unilateral humeral shaft fracture who are willing to participate in the study after informed  
43 consent are randomly assigned to two different treatment methods:

44  
45 Surgical treatment with an open reduction and internal fixation with a 4,5mm locking plate.

46 Conservative treatment with functional bracing

47  
48 The randomization is done using blocked randomization (block sizes are not known by the enrolling or assigning  
49 physician) and stratification is done according to fracture type (AO-OTA type A vs. type B/C) and radial nerve status  
50 (total/subtotal motor palsy vs. no palsy).

51  
52 Standard follow-up visits at 6 weeks, 3, 6 and 12 months are arranged. Later follow-up visits are arranged at 2, 5 and  
53 10 years for the study purpose. Patients fill evaluation forms and clinical and radiological assessments are made. The  
54 physiotherapist doing objective functional measurements is blinded to treatment method. Both study groups receive  
55 physiotherapy after the initial treatment.

56  
57 **Study Design**

58 **Study Type:** Interventional

59 **Interventional Study Model:** Parallel Assignment

60 **Number of Arms:** 2

61 **Masking:** Single Outcomes Assessor

62 **Allocation:** Randomized

63 **Enrollment:** 100 [Anticipated]

64  
65 **Arms and Interventions**

66 **Active Comparator:** Conservative treatment

67 Conservative treatment with functional brace and physiotherapy.

68 Device: Conservative treatment

69 Conservative treatment with functional brace applied after 7 days of initial treatment with prefabricated cork splint.

70 Physiotherapy

71 Physiotherapy is arranged to both groups at 3 and 9 wks.

72 **Experimental:** Operative treatment

73 Operative treatment with open reduction and internal fixation with 4,5mm locking compression plate. Physiotherapy  
74 at 3 and 9 wks.

75 Procedure: Operative treatment

76 Operative treatment with open reduction and internal fixation using 4,5mm locking compression plate.

77 Physiotherapy

78 Physiotherapy is arranged to both groups at 3 and 9 wks.

79

## 80 **Outcome Measures**

81

82 Primary Outcome Measures:

83 1. Pain at rest and in activity, Change in Numerical Rating Scale (NRS) 0-10

84 at 6 wks, 3, 6, 12 mo, 2, 5, 10 years

85 2. Change in The Disabilities of the Arm, Shoulder and Hand Score (DASH)

86 at 6 wks, 3, 6, 12 mo, 2, 5, 10 years

87

88 Secondary Outcome Measures:

89 3. Subjective assessment of the function of the upper extremity

90 Numerical Rating Scale (NRS) 0-10 Subjective assessment of the function of the upper extremity

91 4. Constant Score

92 5. Elbow ROM

93 6. Health-related quality of life (15D)

94 7. Complications

95 Incidence of re-fracture, reoperation, infection and iatrogenic radial palsy is recorded and compared  
96 between study groups.

97 8. Union

98 Time to union, non-union, malunion Union

99 9. Cost-effectiveness

100 Quality-adjusted life years/months measured as a change in 15D tool, pain-NRS and other outcome  
101 measures. Cost-effectiveness

102 10. Subjective assessment of the function of the upper extremity

103 Likert Scale 1-7 Subjective assessment of the function of the upper extremity

104 11. Subjective assessment of the function of the elbow

105 Numerical Rating Scale (NRS) 0-10 Subjective assessment of the function of the elbow

106

## 107 **Eligibility**

108

### 109 **Inclusion Criteria:**

- 110 • Over 18 years old patient who agrees to the consent to participation in this study
- 111 • Unilateral dislocated humeral shaft fracture (dislocation over thickness of the bone cortex, fracture below the  
112 level of insertion of pectoralis major muscle and 5 cm above the olecranon fossa)
- 113 • Randomization can be done within 10 days and operation within 14 days after the initial trauma
- 114 • Patient is willing to participate all follow-up visits

115

### 116 **Exclusion Criteria:**

- 117 • Bilateral humeral shaft fracture
- 118 • A significant concomitant trauma of the same upper extremity that warrants operative treatment (fracture,  
119 tendon injury, soft tissue trauma)
- 120 • Other fracture or abdominal/thoracic trauma that warrants operative treatment
- 121 • Open fracture

- 122 • Pathological fracture
- 123 • Multi-trauma patient
- 124 • Vascular injury
- 125 • Plexus injury
- 126 • Previous trauma in the same upper extremity that causes functional deficit
- 127 • Trauma or condition that warrants use of walking aid (crutches, wheelchair etc.)
- 128 • Disease that affects significantly general condition of the patient
- 129 • Significantly impaired ability to co-operate for any reason (substance abuse, mental disorder, dementia)
- 130 • Unwilling to accept both treatment methods

131

### 132 **1.2. Final Protocol – Amended Sections Only**

133 (the final protocol was published in its entirety in Rämö et al<sup>1</sup>)

134 The final protocol submitted to ClinicalTrials.gov can be accessed at:

135 <https://clinicaltrials.gov/ct2/show/NCT01719887>

136

137 **Enrollment:** ~~100 [Anticipated]~~ 82 [Actual]

138

### 139 **Outcome Measures**

140

141 Primary Outcome Measures:

- 142 1. ~~Pain at rest and in activity, Change in Numerical Rating Scale (NRS) 0-10~~
- 143 ~~at 6 wks, 3, 6, 12 mo, 2, 5, 10 years~~
- 144 2. ~~Change in The Disabilities of the Arm, Shoulder and Hand Score (DASH)~~
- 145 ~~at 6 wks, 3, 6, 12 mo, 2, 5, 10 years months~~
- 146 1. The Disabilities of the Arm, Shoulder and Hand Score (DASH) at 12 months

147

148 Secondary Outcome Measures:

- 149 7. Complications
- 150 Incidence of complications (i.e. non-union, malunion, re-fracture, reoperation, infection and
- 151 iatrogenic radial palsy) is recorded and compared between study groups.
- 152 11. The Disabilities of the Arm, Shoulder and Hand Score (DASH)
- 153 at 6 wks, 3, 6 mo, 2, 5, 10 years
- 154 12. Pain at rest and in activity, Numerical Rating Scale (NRS) 0-10
- 155 at 6 wks, 3, 6 mo, 12 mo, 2, 5, 10 years
- 156 13. Percentage of patients with acceptable symptom state (PASS)

157

### 158 **1.3. Summary of Amendments**

159

160 *Primary and secondary outcomes*

161

- 162 - Pain at rest and activities downgraded as secondary outcomes
- 163 - DASH at 12 months specified as the single primary outcome and other time points downgraded to secondary
- 164 outcomes

165

166 When we registered the trial in ClinicalTrials.gov, our primary outcome measures were the pain at rest and activities  
167 at 6 weeks, 3 months, 6 months and 12 months as well as change in DASH at 6 weeks, 3 months, 6 months and 12  
168 months. The secondary outcomes were as listed above in the original protocol. After discussing within the study group  
169 about the complexity of having several outcome measures at different time points we first decided to downgrade  
170 other time points than 12 months to secondary outcomes (the change was sent to clinicaltrials.gov on January 23,

171 2013) and later on we made a decision to have only one primary outcome, DASH at 12 months, since this instrument  
172 contains also questions regarding pain at rest and at activities. The change was made to clinicaltrials.gov on August 19,  
173 2016.

174

175 - Percentage of patients with acceptable symptom state (PASS)

176

177 We added this secondary outcome when preparing our protocol publication in the spring 2017 and it was added to  
178 clinicaltrials.gov on May 28, 2017. We felt it would add value to our list of secondary outcomes if we define PASS of  
179 DASH score in our study population and define which part of the study group has achieved this at different time  
180 points.

181

182 *Enrollment*

183

184 - Enrollment from 100 [anticipated] to 82 [actual]

185

186 When we first registered the study, we reported the enrollment to be 100 patients. We had done the power analysis  
187 which showed 35 patients per group and we decided to have 12,5% lost to follow-up reservation. When we sent our  
188 study protocol to the ethical board of Helsinki and Uusimaa Hospital District, we put the correct value of 80 patients  
189 to the target field. We first registered the enrollment target to 100 patients and after noticing this mistake we made  
190 the correction to clinicaltrials.gov on May 28, 2017 when we unified the registered protocol between clinicaltrials.gov  
191 and the accepted protocol paper<sup>1</sup>. The number of enrolled patients became 82 since the enrollment took place in two  
192 separate units and we were unable to stop the recruiting exactly at 80 patients. After noticing we had achieved the  
193 target, we stopped the enrollment on January 2018.

194

195 Be it noticed here that all the above noted amendments to the original protocol were made prior to completion of the  
196 trial and before doing any data analysis and prior revealing the allocations of the study groups.

197

198 **2. STATISTICAL ANALYSIS PLAN**

199

200 **2.1. Original Statistical Plan**

201

202 A description of our original statistical analysis plan was published<sup>1</sup> as follows:

203

204 The data will be analyzed using IBM SPSS Statistics V.23 or higher. The results will be reported following the  
205 Consolidated Standards of Reporting Trials statement.

206 The baseline characteristics of the participants will be summarized by group, reported as a mean (SD)  
207 or median (first quartile, third quartile) for continuous variables, and count (%) for categorical variables.

208 Primary statistical analyses will be performed using intention-to-treat basis. For the primary analysis, a  
209 mixed-effects model (MM) analysis will be performed using the data set without multiple imputation to compare the  
210 mean DASH scores. Treatment group and visits will be included as fixed factors and patient as a random factor. The  
211 model will include interactions between treatment and visit. Randomization stratification factors and baseline value  
212 will be included as covariates. The treatment effect will be quantified with an absolute difference between the groups  
213 in the DASH score with the associated 95% CI and p value at 12 months post-randomization.

214 The MM model will also be used to analyze secondary outcomes where applicable (pain-NRS at rest  
215 and during activities, 15D, CS). For categorical response variables, effects will be analyzed by logistic regression  
216 analysis with treatment as the fixed-factor covariate. These secondary outcomes will only be supportive, explanatory  
217 or hypothesis-generating (or both), which is why multiplicity is not considered to be a problem.

218 The adverse events of the study arms will be reported descriptively. If the number of events is large  
219 enough, an analysis between study arms will be performed.

220 All scale variables will be tested for normality with the Kolmogorov-Smirnov test. Variance of  
221 homogeneity will be tested using Levene's test. We consider a two-sided p value of 0.05 to indicate statistical  
222 significance.

223 We will perform secondary statistical analyses to identify potential effect-modifying and mediating  
224 factors. Potential effect-modifying factors to be tested with regression analyses are age, gender, body mass index,  
225 physical activity, smoking, level of education, fracture of dominant/non-dominant arm and position of the fracture.  
226 The absence of adverse effects and treatment attendance as intended will be analyzed as a potential effect-mediating  
227 factor.

228 We will also perform an on-treatment analysis if there are patients treated with a non-allocated  
229 method because patients declined the allocated treatment after the randomization, thus causing crossover in study  
230 arms. A medical reason to change treatment method, practically from conservative treatment to ORIF because of non-  
231 union or fracture threatening skin integrity in the early phase of treatment, will not be considered as a crossover.  
232 However, we will analyze such patients in a separate subgroup.

233

234 **2.2. Blinded Data Interpretation Protocol**

235

236 We used blinded data interpretation in analyzing the results of this trial.<sup>2</sup> The blinded data interpretation protocol was  
237 published in our protocol paper<sup>1</sup> as follows:

238 Before accessing the primary outcome data, the Writing Committee will record a 'Background assumptions'  
239 statement, which will contain our definition of MID of the outcome measures and a brief summary of the key  
240 statistical analysis used in the evaluation of the outcome data. The document will be signed by the members of the  
241 Writing Committee and published as an appendix to the primary publication. After this, the Writing Committee will  
242 write two interpretations of the trial results on the basis of a blinded review of the primary outcome data (treatment  
243 A compared with treatment B), with the assumption that A is the ORIF group and another assuming that A is the  
244 conservatively treated group. Decisions regarding the key analyses and presentation format for the primary  
245 publication before data analysis will also be decided in a meeting of the Writing Committee. The minutes of this  
246 meeting will be recorded as a statement of interpretation document, which will be signed by all members of the  
247 Writing Committee before the unsealing of the randomization.

248  
249  
250  
251  
252  
253  
254  
255  
256  
257  
258  
259  
260  
261  
262  
263  
264  
265  
266  
267  
268  
269  
270  
271  
272  
273  
274  
275  
276  
277  
278  
279  
280  
281  
282  
283  
284  
285  
286  
287  
288  
289  
290  
291  
292  
293  
294  
295  
296  
297

### **2.3. Final Statistical Analysis Plan - Amendments**

The statistician doing the data analysis is using Stata version 15.1 (StataCorp LLC, Texas, USA) instead of IBM SPSS Statistics. We consider this a minor technical detail which does not affect the interpretation of our results.

Instead of Kolmogorov-Smirnov test for normality and Levene’s test for homogeneity, we will use other techniques, e.g., graphical evaluation.

All P values larger than 0.01 are be reported to two decimal places, and those between 0.01 and 0.001 to three decimal places; P values smaller than 0.001 are be reported as  $P < 0.001$ . We made this amendment since we did not state this in our protocol paper.

#### **Primary analysis –Amendments**

The primary comparison on the effectiveness of the treatment will be performed as a between-group comparison using a mixed-model repeated-measures analysis of variance (MMRM ANOVA). In the original analysis plan we used a term ‘MM model’ but changed the term to ‘MMRM ANOVA’ as it is more widely used term. We consider this only a terminological issue not affecting the analysis.

Study group and time of assessment (baseline, 6 weeks, 3, 6 and 12 months) were included as fixed factors, patient as a random factor. The model included interactions between study group and time of assessment. Change from baseline was estimated with baseline value as covariate. An unstructured covariance structure will be assumed. If the model cannot be fitted, compound symmetry will be assumed instead. The number of degrees of freedom will be assessed using Satterthwaite's method. The MMRM model will be used to quantify the treatment effect as the absolute difference between the groups in DASH score with the associated 95% confidence interval (CI) and p-value at 12 months post-randomization.

### **2.4. Implementation of Analysis Plan**

This SAP will be used as a work description for the statistician performing the analyses. All analyses will be performed by the same statistician and none of the investigators involved in this trial will perform any of the statistical analyses.

The implementation of the SAP will be as follows:

1. A ‘data collection form’ will be outlined in a collaboration between the database manager (Leena Caravitis) and principal investigator (Lasse Rämö) and senior author (Simo Taimela).
2. The database manager will code each treatment arm into ‘Group A’ and ‘Group B’, thus leaving all others blinded to group assignment during the analyses.
3. Blinded data will be delivered to the statistician according to the ‘data collection form’.
4. Primary, secondary and exploratory endpoint analyses will be made blinded to group assignment.

Results will be presented to the trial Writing Committee, any uncertainties will be clarified and blinded interpretations of the primary endpoint results will be conducted prior to unblinding of data.

A detailed description of the execution of the statistical analysis can be found in our “Blinded Data Analyses Statement of Interpretation”-document (Supplementary Appendix of our submission).

Be it reiterated here that the entire statistical analysis was carried out blinded and the randomization code was broken only after the main findings/interpretation of the results were mutually agreed on (and documented) by the entire manuscript writing committee.

298

299 **References**

300

301 1. Rämö L, Taimela S, Lepola V, Malmivaara A, Lähdeoja T, Paavola M. Open reduction and internal fixation of  
302 humeral shaft fractures versus conservative treatment with a functional brace: a study protocol of a randomised  
303 controlled trial embedded in a cohort. *BMJ Open*. 2017;7(7):e014076. doi:10.1136/bmjopen-2016-014076.

304 2. Järvinen TLN, Sihvonen R, Bhandari M, et al. Blinded interpretation of study results can feasibly and effectively  
305 diminish interpretation bias. *Journal of Clinical Epidemiology*. 2014;67(7):769-772.  
306 doi:10.1016/j.jclinepi.2013.11.011.

307
