# Supplementary material
Source: PubMed Central journal article supplement (PMC7218498)
Supplement: jama-323-1792-s003.pdf [file jama-323-1792-s003.pdf]

## Data Sharing Statement

### Data

**Data available:** Yes

**Data types:** Deidentified participant data, Data dictionary

**How to access data:** Data will be provided on reasonable request to corresponding author Lasse Rämö ([lasse.ramo@hus.fi](mailto:lasse.ramo@hus.fi))

**When available:** With publication

### Supporting Documents

**Document types:** Informed consent form, Other (please specify)

**Additional Information:** Templates of forms used in data collection from participants.

**How to access documents:** Supporting documents will be provided on reasonable request to corresponding author Lasse Rämö ([lasse.ramo@hus.fi](mailto:lasse.ramo@hus.fi))

**When available:** With publication

### Additional Information

**Who can access the data:** researchers whose proposed use of the data has been approved

**Types of analyses:** meta-analysis

**Mechanisms of data availability:** with investigator support after approval of a proposal
